# Supplementary material
Source: Springer Nature journal article supplement (https://www.springermedizin.de/resource/supplementary/13102_2009_27_MOESM1_ESM.pdf/9667574)

**Fibroblast**

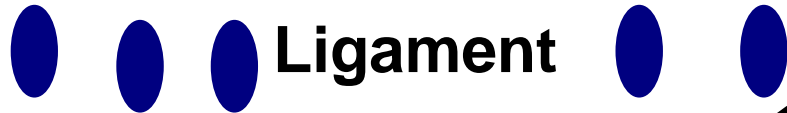

**Ligament**

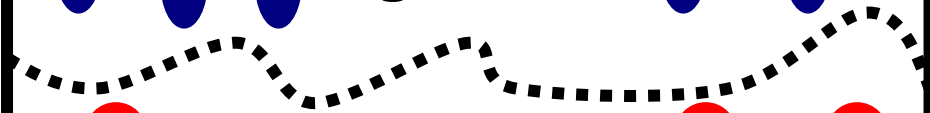

**Uncalcified fibrocartilage**

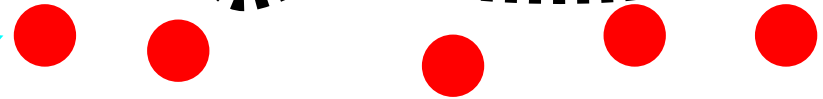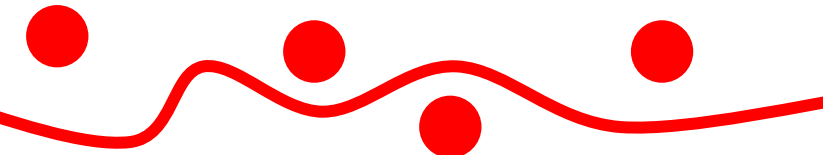

**Calcified fibrocartilage**

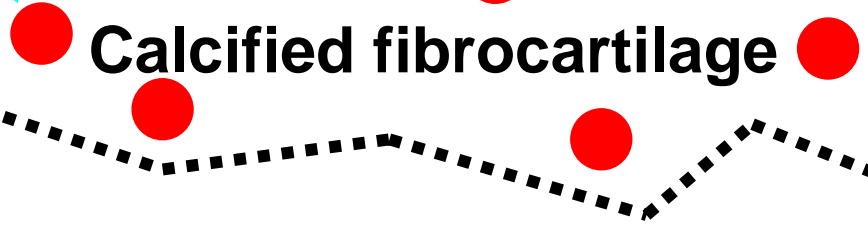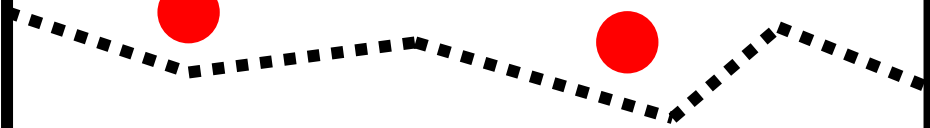

**Bone**

**Chondrocyte**

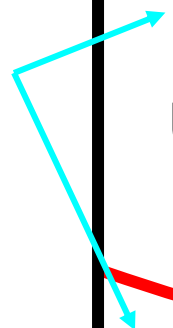

**Tidemark**

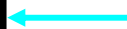

Supplement: MOESM1 [file 9667574]
